# Supplementary material
Source: PubMed Central journal article supplement (PMC2971610)
Supplement: pp.110.160234_1.pdf [file pp.110.160234_1.pdf]

# Figure S1

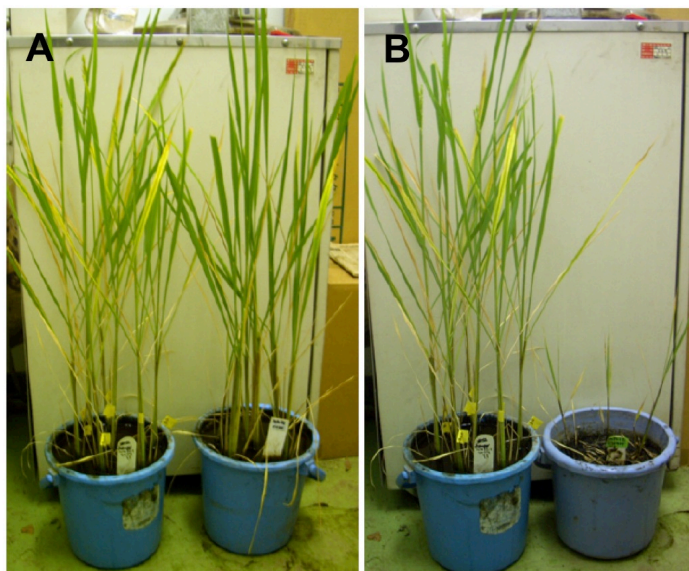

**Supplemental Figure S1.** Complementation of *waf1-1* by *WAF1* genomic fragment. A, *waf1-1* plant complemented by *WAF1* genomic fragment (left) and wild-type plant (right). B, Complemented *waf1-1* plant (left) and *waf1-1* mutant plant (right).
